# Mood disorders and fertility in women: a critical review of the literature and implications for future research

Katherine E. Williams<sup>1</sup>, Wendy K. Marsh and Natalie L. Rasgon

Stanford Center for Neuroscience in Women's Health, Department of Psychiatry and Behavioural Sciences, Stanford University and Hospitals, Stanford, CA 94305, USA

<sup>1</sup>Correspondence address. Tel: +1-650-723-2779; Fax: +1-650-724-3144; E-mail: elliew@stanford.edu

**A medline literature review of fertility and mood disorder articles published since 1980 was performed in order to critically review the literature regarding a relationship between mood disorders, fertility and infertility treatment. Previous studies suggests that mood disorders, both in the bipolar and unipolar spectrum, may be associated with decreased fertility rates. Most studies report that women seeking treatment for infertility have an increased rate of depressive symptoms and possibly major depression (none showed evaluated mood elevations). Many, but not all, studies found that depressive symptoms may decrease the success rate of fertility treatment. Treatments for infertility may independently influence mood through their effects on estrogen and progesterone, which have been shown to influence mood through their actions on serotonin. Studies are limited in scope and confounding variables are many, limiting the strength of the results. In conclusion, a range of existing studies suggests that fertility and mood disorders are related in a complex way. Future studies should use clinical interviews and standardized and validated measures to confirm the diagnosis of mood disorders and control for the variables of medication treatment, desire for children, frequency of sexual intercourse, age, FSH levels, menstrual cycle regularity in assessing an interrelationship between mood disorders and fertility.**

*Keywords:* mood disorders; infertility; fertility; women; menstrual cycle

## Introduction

Women are at their greatest lifetime risk for mood disorders during their childbearing years (Weissman and Olfson, 1995). Mood, or affective, disorders include unipolar depression and bipolar disorder (American Psychiatric Association, 2000). The lifetime prevalence of major depression is 16.6% and bipolar disorder 3.9%. Adult women are at significantly greater risk, up to one and a half times that of men, of having a mood disorder (Maciejewski *et al.*, 2001; Kessler *et al.*, 2005). Infertility, clinically defined as the inability to conceive a child within one year, is also a common problem, affecting an estimated 5–10% of women (Abma *et al.*, 1997). The question of whether mood disorders influence or contribute to infertility in women is an area in need of further research.

The goals of this paper are to critically review the literature regarding the relationship between mood disorders and fertility in women and identify variables that need further investigation. We examine primary studies found in a Pub-Med literature search on women, fertility status and mood from 1980 onwards. We used the following key words in combination: depression, depressive disorder, major depression, depressive episode, mania, bipolar disorder, psychiatric disorders, or mood disorder, with menstrual cycle, infertility, fertility, conception, *in vitro*

fertilization (IVF), menstrual cycle, functional hypothalamic amenorrhea, hypothalamic-pituitary-gonadal axis (HPG) or pregnancy.

Several reviews address stress, depressive symptoms and anxiety in relation to fertility (Edelmann and Connolly, 1986; Wright *et al.*, 1989; Golombok, 1997; Greil, 1997). However, in this review, we focus our analysis on clearly defined mood disorders. In part one, we investigate and analyze the interrelationship of mood disorders and fertility by reviewing the literature under the following domains: studies of fertility rates in women with mood disorders, including pregnancy rates in IVF patients with major depression, and rates of mood disorders in women with the diagnosis of infertility. In part two, we provide recommendations for future research.

## Part I: mood disorders and fertility

### *Epidemiological studies of fertility in women with the diagnosis of mood disorders*

Only five studies of fertility rates in women with clearly diagnosed mood disorders have been published since 1980 (Table 1) (Odergard, 1980; Baron *et al.*, 1982; Calzaroni *et al.*, 1990; Jonsson, 1991, Harlow *et al.*, 2003). Two studies were excluded, see Table 2, Lapane *et al.*, 1995, Grodstein *et al.*, 1993. The

**Table 1:** Epidemiological studies of fertility rates in women with mood disorders

| Author                    | Year | N      | Subjects selected                                               | Fertility result                                                   | Medical cause of infertility | Controlled for age | Incidence of infertility | Desire for children | Attempts to conceive | Birth control use | Medication use |
|---------------------------|------|--------|-----------------------------------------------------------------|--------------------------------------------------------------------|------------------------------|--------------------|--------------------------|---------------------|----------------------|-------------------|----------------|
| Calzeroni <i>et al.</i> , | 1990 | 112    | Bipolar and unipolar disorder with suicide attempt or delusions | Decreased number of children compared to non-suicide or delusional | Not assessed                 | No                 | Not assessed             | Not assessed        | Not assessed         | Not assessed      | Not assessed   |
| Jonsson                   | 1991 | 17     | Affective disorder, hospitalized                                | Decreased, 71.2% of expected fertility                             | Not assessed                 | No                 | Not assessed             | Not assessed        | Not assessed         | Not assessed      | Not assessed   |
| Odergard                  | 1980 | 30 428 | Hospitalized for unipolar depression, bipolar disorder          | No different than population                                       | Not assessed                 | No                 | Not assessed             | Not assessed        | Not assessed         | Not assessed      | Not assessed   |
| Baron <i>et al.</i> ,     | 1982 | 74     | Bipolar disorder                                                | Decreased, fertility in both sexes                                 | Not assessed                 | Yes                | Not assessed             | Not assessed        | Not assessed         | Not assessed      | Not assessed   |
| Harlow <i>et al.</i> ,    | 2003 | 332    | History of MDE                                                  | Decreased, early decline ovarian function                          | Not assessed                 | No                 | Not assessed             | Not assessed        | Not assessed         | Not assessed      | Not assessed   |

definition of fertility varies among the studies, as does the point at which fertility is evaluated, since some studies only investigate fertility before the onset of the first psychiatric episode (Odergard, 1980; Jonsson, 1991), and others after the first episode (Baron *et al.*, 1982; Calzeroni *et al.*, 1990; Harlow *et al.*, 2003). Age, an important factor in infertility, is often not controlled (Odergard, 1980; Calzeroni *et al.*, 1990; Jonsson, 1991; Harlow *et al.*, 2003), nor are occult causes of decreased fertility evaluated, such as male factor infertility, number of years married, desire and attempts to conceive, infertility evaluation or infertility treatment.

Odergard (1980) analyzed the number of children born prior to the first psychiatric admission of married women hospitalized for serious mental illness in Norway between 1936 and 1975. The 30 438 women evaluated had 60 916 children, and Odergard reported that the relative fertility, (here defined as number of children observed per 100 expected) was not statistically significantly different from the general population for patients within the diagnostic categories evaluated: affective disorders, bipolar disorder and major depression. This study is limited by the fact that it only investigates fertility of women prior to the first psychiatric

admission, leaving unclear the timing of onset of the affective disorder in relationship to childbirth.

In contrast, Baron *et al.*'s (1982) study of fertility rates in male and female bipolar patients controlled for several of these variables, including age of subjects, and investigated fertility rates before and after illness onset. Baron *et al.*'s population included 60 males and 74 females admitted to the Lithium Clinic of the New York State Psychiatric Institute between 1968 and 1974. Strict diagnostic criteria for bipolar affective disorder were used, and the age at evaluation, age at illness onset (not just the first psychiatric admission), the number and age of all children per person regardless of marital status were computed. The authors referenced a reduced fertility rate in both genders in comparison to US population norms by age. Most importantly, they found that fertility was reduced even prior to the onset of illness and stayed lower than expected in women. Men, in contrast, had an even greater reduction in fertility after the onset psychiatric illness.

Similarly decreased fertility rates were observed for those with severe mental illness in a small comparison study of patients hospitalized in 1925 (Jonsson, 1991). Irrespective of marital status,

**Table 2:** Excluded studies of fertility rates in women with mood disorders

| Author                    | Year | N   | Subjects selected                              | Standardized mood assessment              | Fertility result                         | Reasons for exclusion             |
|---------------------------|------|-----|------------------------------------------------|-------------------------------------------|------------------------------------------|-----------------------------------|
| Lapane <i>et al.</i> ,    | 1995 | 428 | Women with a self report of antidepressant use | No, mood questionnaire created by authors | 2x as likely to self-report infertility  | Lack of diagnostic validity, mood |
| Grodstein <i>et al.</i> , | 1993 | 5   | Antidepressant use >6 mo                       | No, none                                  | Increased risk for ovulatory infertility | Mood not assessed                 |

40 women with the diagnosis of a mood disorder had birth rates significantly less than the age matched population norm. The fertility rate of these women was 71.2% of the expected frequency. As in Baron *et al.*'s study, fertility was decreased in women with mood disorders even before the first psychiatric admission.

Lower rates of fertility in women with a history of major depression were also found in the Harvard study of moods and cycles, a unique prospective study of women in the transition to menopause (Harlow *et al.*, 2003). Women with a current diagnosis or lifetime history of major depression were significantly more likely than women without to have fewer live births. Although the study reported that women with a lifetime history of major depression had higher rates of divorce, separation and widowhood, it did not report important variables regarding potential for fertility, such as number of years married, desire and attempts to conceive, infertility evaluation or infertility treatment.

Calzeroni *et al.*, (1990) studied fertility rates of 186 male and female patients with DSMIII-R diagnosed major depression with psychotic features and compared patients with mood congruent delusions or suicidal behavior to those without. Fertility was determined only in married subjects under 45 years old and expressed as mean number of legitimate children born alive, as a percentage of childless patients and as high (more than two children) or low fertility (less than two children). Patients who had attempted suicide had significantly fewer children than that of non-attempters (1.5 + 0.9 versus 1.9 + 1.1) and there was lower frequency of high fertility cases, despite similar rates of childless patients in the two groups. There was no significant difference between patients with and without delusions in rates of childlessness (12/99 versus 4/29) but patients without psychotic symptoms were 2.4 times more likely to show a condition of high fertility.

These non-psychotic patients had a non-significant trend for an increased mean number of children, thus suggesting differential fertility within the members of this group.

To make conclusions about the fertility rate in women with mood disorders is difficult because of the variability of the studies, although the above findings are suggestive of a potential reduced fertility rate when fertility is defined as observed versus expected number of children. Two questions that do emerge from these studies are whether fertility is diminished prior to the first mood episode, and therefore may be a sign of a greater risk for later onset of a mood disorder and whether specific phenotypes of mood disorders are associated with greater reductions in fertility.

#### *Menstrual abnormalities in unipolar and bipolar disorders*

Depressive symptoms have been associated with changes in the menstrual cycle that may lead to reduced female fertility. Six studies are listed in Table 3 and three excluded studies in Table 4. In a large, carefully controlled cross-sectional study of adolescent girls, Bisaga *et al.*, (2002) reported that depressive symptoms (defined as a Beck Depression Inventory > 16) were associated with late menarche, secondary amenorrhea and irregular menstrual cycles. Two large cross-sectional studies of women have also reported that women with a current or past history of depression report a history of early menstrual irregularity. However, both studies are limited by recall problems inherent in retrospective diagnosis as well as a lack of control groups (Rowland *et al.*, 2002; Harlow *et al.*, 2004).

Joffe *et al.*, (2006) did include a control group in a study comparing 245 women with major depression to 619 healthy controls,

**Table 3:** Menstrual cycle characteristics in women with a mood disorder diagnosis

| Author                  | Year | N    | Mood disorder                   | Menstrual cycle result                                                             | Controlled for age                        | Endocrine evaluation                                             | BMI         | Substance use | Hormonal contraception |
|-------------------------|------|------|---------------------------------|------------------------------------------------------------------------------------|-------------------------------------------|------------------------------------------------------------------|-------------|---------------|------------------------|
| Bisaga <i>et al.</i> ,  | 2002 | 2547 | BDI depression                  | Delayed menarche, secondary amenorrhea, irregular cycles                           | 13–18 selected                            | None                                                             | Yes         | Assessed      | Not reported           |
| Harlow <i>et al.</i> ,  | 2003 | 644  | History of MDE                  | Early menopause                                                                    | 36–45 selected                            | FSH, LH, estradiol                                               | Yes         | Not assessed  | Excluded               |
| Rowland <i>et al.</i> , | 2002 | 3941 | History of antidepressant use   | Intermenstrual bleeding, irregular cycles and long cycles                          | 21–40 selected                            | None                                                             | Yes         | Not assessed  | Not reported           |
| Rasgon <i>et al.</i> ,  | 2005 | 80   | Bipolar disorder                | Oligomenorrhea, amenorrhea                                                         | 18–45 selected                            | FSH, LH, estradiol, free testos-terone, 17 alpha OH progesterone | Yes         | Not assessed  | Excluded               |
| Rasgon <i>et al.</i> ,  | 2003 | 17   | Bipolar disorder                | Long menstrual cycles                                                              | 18–45 reported                            | None                                                             | No (weight) | Not assessed  | Included               |
| Joffe <i>et al.</i> ,   | 2006 | 1059 | Unipolar and bipolar depression | History of menstrual abnormalities: bipolar greater than unipolar or healthy women | Bipolar 18–45, Unipolar and healthy 36–45 | None                                                             | Yes         | Not Assessed  | Not reported           |

**Table 4:** Excluded studies, menstrual cycle in women with a mood disorder

| Author                  | Year | N   | Mood disorder                         | Menstrual cycle result                                          | Reason excluded                   |
|-------------------------|------|-----|---------------------------------------|-----------------------------------------------------------------|-----------------------------------|
| Harlow <i>et al.</i> ,  | 1995 | 344 | Major depression, treated             | Early menopause                                                 | Women were perimenopausal         |
| Kemeter                 | 1988 | 551 | Geisen personality test', depressive' | Higher depression score correlated with intermenstrual bleeding | Lack of diagnostic validity, mood |
| Resch <i>et al.</i> ,   | 1999 | 75  | BDI depression                        | Depression prevalence 64% in non-organic menstrual disorder     | Eating disorder subjects          |
| Gendell <i>et al.</i> , | 2000 | 82  | SCID depression                       | Depression contribute to perpetuation of menstrual disturbances | Eating disorder subjects          |

and found no statistical significance between the two groups regarding history of menstrual abnormalities prior to the diagnosis and treatment of a mood disorder. However, in the 295 bipolar women in this study, a history of menstrual abnormalities was more common (34%) than in the depressed women (24.5%) or the control women (21%). Rasgon *et al.*, (2005) also found that in women with bipolar disorder, menstrual abnormalities frequently preceded treatment with a mood stabilizer. These studies, while limited by recall bias, are intriguing because they suggest that if a higher rate of menstrual abnormalities exists in women with mood disorders, then the hypothalamic gonadal axis (HPG) may be affected by the disorder even prior to, or in conjunction with the hypothalamic adrenal axis.

Surprisingly, there are few studies which have carefully evaluated the presence of major depressive disorder in women with functional hypothalamic amenorrhea (FHA). FHA is characterized by disturbances in GnRH pulsatility and this disturbance appears to be mediated by increased cortisol, since basal ACTH and cortisol levels have been found to be higher in FHA patient compared with controls (Meczekalski *et al.*, 2000). In their comparison of women with FHA, women with organic amenorrhea and eumenorrheic control women, Marcus *et al.*, (2001) found that women with FHA reported more depressive symptoms and dysfunctional attitudes than eumenorrheic women, but not significantly more than women with organic amenorrhea. Since standardized depression scales were not used, it is not clear whether the women met criteria for an affective disorder. Thus, we recommended that future studies of FHA characterize depressive phenotype, including whether patients meet criteria for the subtypes most classically associated with hypercortisolemia in mood disorders, such as melancholic and psychotic depression.

#### **Phenotypic differences in depression and potential influence on fertility**

One mechanism by which depressive disorders may influence fertility is by the symptoms of decreased energy, libido, self-esteem, increased guilt and psychomotor retardation. Suicidal ideation also would be expected to decrease motivation for a new life and this was found in Calzeroni *et al.*'s study (1990).

Bipolar disorder may also influence fertility, since increased libido is a common experience during mood elevations. However, other symptoms that occur during hypomania or

mania, such as an increase in behaviors that may cause self harm or injury and a decline in self-care, would not be expected to improve fertility.

Future studies should examine the relationship between fertility and specific depressive or manic phenotypes since not all patients with a mood disorder experience the same severity of symptoms that may influence fertility. Future epidemiological studies of mood disorders and fertility should attempt to assess for frequency of sexual intercourse, desire for children and presence or absence of birth control as well.

#### **Psychopharmacologic considerations**

##### *Antidepressants and fertility*

The use of psychotropic medications needs to be critically assessed in studies of fertility rates in patients with mood disorders, since several treatment medications may impact fertility. For example, the decreased libido seen with serotonin selective reuptake inhibitors (SSRIs) has not been assessed specifically in relation to fertility in mood disorders. Furthermore, these medications may affect fertility rates by potentially increasing spontaneous abortion rates. A recent meta-analysis of six cohort studies of 1534 antidepressant exposed women and 2033 non-exposed women found that exposure to antidepressants was associated with a significant increase in rates of spontaneous abortion (3.9%). No differences were found among classes of drug (Hemels *et al.*, 2005). Klock *et al.*'s (2004) recent pilot study, a retrospective chart review of the IVF outcome of women taking SSRIs and women not taking SSRIs, found that 40% of women taking SSRIs had ongoing pregnancies compared with 51% not taking SSRIs. The study is unique in that it controlled for key variables that could affect fertility, and reported that there were no differences in number of oocytes fertilized, percentage of eight cell blastocysts developed or initial hCG values.

Although it is an apparently uncommon phenomenon, antidepressants have been associated with the onset of hyperprolactinemia. Hyperprolactinemia could be an independent variable that influences menstrual cycle function, and consequently fertility, in depressed women. (Emiliano and Fudge, 2004).

##### *Mood stabilizers and fertility*

No studies exist for the influence of the mood stabilizers, lithium, valproic acid, carbamazepine and lamotrigine, on fertility rates in

women with mood disorders. Several investigations have suggested that valproic acid may decrease fertility in women since it has been associated with hyperandrogenism, hyperinsulinemia and dyslipidemia and menstrual abnormalities (Morrell *et al.*, 2003, 2005; Rasgon *et al.*, 2004). Valproic acid is a well documented teratogen, but the impact of this medication on fertility is currently unknown (Holmes *et al.*, 2001).

Atypical antipsychotics are increasingly used in the treatment of mood disorders, as mood stabilizers (Malhi *et al.*, 2003), to treat mania (Perlis *et al.*, 2006) and to augment antidepressant response (Nemeroff, 2005). These medications, especially risperidone, may increase prolactin levels in women even at low doses (Haddad and Wieck, 2004). The associated hyperprolactinemia may lead to menstrual cycle abnormalities and thereby independently influence fertility. The only existing prospective study of pregnancy outcome of women using atypical antipsychotics includes both mood and psychotic disorder patients. This study found that olanzapine, risperidone and quetiapine are not associated with an increased risk of spontaneous abortions (McKenna *et al.*, 2005).

### Rates of mood disorders in female patients with infertility

Another approach to evaluating whether mood disorders lead to decreased fertility is to review the prevalence of these disorders in infertility patients. An increased prevalence of depressive symptoms in infertility patients compared with a variety of control groups has been found in most (Link and Darling, 1986; Reading *et al.*, 1989; Stewart *et al.*, 1992; Domar *et al.*, 1992, 1993; Merari *et al.*, 1992; Thiering *et al.*, 1993; Chiba *et al.*, 1997; Beutel *et al.*, 1999; Lukse *et al.*, 1999; Oddens *et al.*, 1999; Matsubayashi *et al.*, 2001; Fassino *et al.*, 2002) but not all studies (Paulson *et al.*, 1988; Downey *et al.*, 1989; Connolly *et al.*, 1992; Downey *et al.*, 1992; Hynes *et al.*, 1992; Beuarepaire *et al.*, 1994; Visser *et al.*, 1994; Bringhenti *et al.*, 1997; Slade *et al.*, 1997; Emery *et al.*, 2003; Guz *et al.*, 2003). The differing findings regarding rates of depression result from several methodological differences and problems. Most of the studies only used questionnaires to assess psychiatric symptoms. Also, the control groups vary and include no controls (Beuarepaire *et al.*, 1994; Yong *et al.*, 2000; Chen *et al.*, 2004), age matched gynecology out patient controls (Kee *et al.*, 2000; Fassino *et al.*, 2002), pregnant patient controls (Matsubayashi *et al.*, 2001; Fido and Saheed, 2004), medical patient controls (Domar *et al.*, 1993) and population controls (Domar *et al.*, 1992; Merari *et al.*, 1992; Thiering *et al.*, 1993; Oddens *et al.*, 1999).

Furthermore, most of these studies are cross-sectional, not prospective, and the differing rates of mood disorders may be due to the timing of the psychiatric evaluation. It is important to assess women at the beginning of their infertility evaluation and treatment process since most (Thiering *et al.*, 1993; Beuarepaire *et al.*, 1994; Slade *et al.*, 1997; Chiba *et al.*, 1997; Guerra *et al.*, 1998; Beutel *et al.*, 1999; Lok *et al.*, 2002; Ramezanzadeh *et al.*, 2004) but not all (Stewart *et al.*, 1992; Domar *et al.*, 1992; Kee *et al.*, 2000; Smeenk *et al.*, 2001) studies have shown that depressive symptoms are related to duration of treatment. However, even when patients are assessed at the beginning of infertility evaluation and treatment, they may have struggled with difficulty conceiving for a long time. Thus it remains difficult

to assess the relationship between the onset of the affective episode and fertility problems.

### Prevalence of major depression in infertility patients

Only a few of the studies that investigate depressive symptoms in newly diagnosed infertility patients actually use diagnostically valid and reliable criteria for confirming a mood disorder (Downey *et al.*, 1989; Fassino *et al.*, 2002; Meller *et al.*, 2002) and they have conflicting results. Downey *et al.*, (1989) compared 59 women who were in the initial stages of infertility treatment to a control group of women presenting for routine gynecological care. The Schedule for Affective Disorders and Schizophrenia-Life-time Version (SADS-L) was used to diagnose major depression. Downey *et al.*, reported no significant difference between patients and controls in rates of current or past major depressive disorder. About 8.5% of the infertility patients met criteria for a current major depressive episode, compared with 2.9% of the control women. About 32.2% of infertility patients had experienced a past episode of MDE compared with 48.6% of the controls.

In contrast, Fassino *et al.*, (2002) did find a significant difference in Hamilton depression (Ham-D) scores between two groups of women who had been attempting pregnancy for less than 2 years and fertile controls. Despite the fact that this study used Axis I psychopathology as an exclusion criteria, both infertility groups reported a significantly higher Ham-D than controls and both groups averaged above cutoff scores for mild depression (Hamilton, 1960). Mean Ham-D scores for women with organic infertility (infertility clearly related to a medical cause) was 15.4 and for women with 'functional' infertility was 11.72. 'Functional' or unexplained infertility was carefully evaluated with a 3 month diagnostic evaluation which included gynecological and andrological clinical examination, seminal liquid evaluation, post-coital test, progesterone assay, hysterosalpingography and, in some cases, biopsy of the endometrium and laparoscopy.

Chen *et al.*, (2004) carefully assessed psychiatric diagnoses in women with varying years since infertility diagnosis. This study used the Mini International Neuropsychiatric Interview as well as Hospital Anxiety and Depression Scale (HADS) to assess the prevalence of psychiatric disorders in 112 women consecutively presenting for infertility treatment. 26.8% of the women met criteria for a mood disorder, 17% for major depression and 9.8% for dysthymia. These results are consistent with previous questionnaire only studies which have found rates of mild to moderate clinical depression ranging from 8–54% in women diagnosed as infertile (Newton *et al.*, 1990; Domar *et al.*, 1992; Demyttenaere *et al.*, 1998; Lukse *et al.*, 1999; Matsubayashi *et al.*, 2001; Lok *et al.*, 2002; Anderson *et al.*, 2003).

### The influence of mood disorders on infertility treatment

Another approach to assessing whether mood disorders influence fertility is to investigate whether the presence of depression influences the outcome of infertility treatment. Although several studies report on depressive or anxiety symptoms and their relationship to IVF outcome, few studies have focused on women who met full criteria for a mood disorder. Included and excluded studies are listed in Tables 5 and 6. Thiering *et al.*,

**Table 5:** The influence of mood disorders on infertility treatment

| Author                       | Year | N   | Mood measure          | Fertility result of higher initial depression score           | FSH reported | Embryo status   | Controlled for age |
|------------------------------|------|-----|-----------------------|---------------------------------------------------------------|--------------|-----------------|--------------------|
| Thiering <i>et al.</i> ,     | 1993 | 330 | CES-D                 | Lower pregnancy rate after first IVF/ET cycle                 | No           | Not reported    | No                 |
| Smeenck <i>et al.</i> ,      | 2001 | 291 | BDI                   | Lower pregnancy rate with first IVF-ICSI                      | No           | 81% transferred | Yes                |
| Demyttenaere <i>et al.</i> , | 1998 | 98  | Zung depression score | Lower pregnancy rates in female indication for one IVF        | No           | 87% transferred | Yes                |
| Emery <i>et al.</i> ,        | 2003 | 141 | BDI                   | Non-significant trend to lower pregnancy rate after one IVF   | No           | Not reported    | No                 |
| Mindes <i>et al.</i> ,       | 2003 | 67  | CES-D                 | Not related to subsequent pregnancy in 6–12 mo                | No           | Not Reported    | No                 |
| Slade <i>et al.</i> ,        | 1997 | 144 | BDI                   | Not related to subsequent pregnancy in up to three IVF trials | No           | Not Reported    | No                 |
| Demyttenaere <i>et al.</i> , | 1992 | 40  | Zung depression score | Lower pregnancy rate in IVF                                   | Yes          | 98% transferred | Yes                |

(1993) used the Center for Epidemiological Studies Depression Scale (CES-D) to evaluate mood state prior to initiating an IVF cycle in 113 first time participants (inductees) and 217 repeat cycle participants (veterans). In both groups, women with major depression (defined as CES-D > 16) had lower rates of pregnancy than non-depressed subjects. However, the important variables of age, FSH, oocyte or embryo status were not assessed in this study.

Smeenck *et al.*, (2001) did control for the variables of age, number of previous pregnancies and number of embryos transferred in their analysis of pregnancy rates in relation to mood state in 291 women undergoing the first IVF/ICSI cycle. Prior to the subject's first IVF medication treatment, the standardized Beck Depression Inventory (BDI) and State and Trait Anxiety Inventory measures were given. Smeenck *et al.*, (2001) found that depression had an independent and significant correlation with lower pregnancy rates; however, state anxiety had an even stronger negative correlation with pregnancy rates.

Demyttenaere *et al.*, (1998) evaluated even more variables that may independently affect pregnancy rates, in their study of depression and coping in 98 women about to begin an IVF cycle for a either male subfertility, female subfertility or combined

male and female infertility. About 54.1% of the women had Zung scores higher than the cutoff score for mild depression, 19.4% for moderate depression and 2% for severe depression. A higher Zung Depression score and greater depressive coping style were associated with lower pregnancy rates. When subfertile women who became pregnant were compared with women who did not, no statistically significant differences were found between the women in terms of age, duration of infertility, number of previous IVF attempts, number of injected ampules of hMG, estradiol concentrations on day 6, number of retrieved oocytes and number of mature oocytes and number of fertilized and transferred embryos.

Not all studies found depressive symptoms associated with decreased pregnancy rates, but is important to note that these studies did not control for age, duration of infertility treatment, FSH, oocyte or embryo status. Slade *et al.*, (1997) did not find BDI depressive symptoms at intake to predict a decrease in pregnancy rates in women seeking infertility treatment. Mild depression scores at intake were not different between women who subsequently became pregnant (26%) and women who did not become pregnant (21%). Moderately depressed women at

**Table 6:** Excluded studies on the influence of mood disorders on infertility treatment

| Author                       | Year | N   | Mood measure             | Fertility result of higher depression score       | Reason excluded                                    |
|------------------------------|------|-----|--------------------------|---------------------------------------------------|----------------------------------------------------|
| Terzioglu                    | 2001 | 30  | BDI                      | Lower pregnancy rate in ART                       | Subjects dropped without explanation               |
| Oddsens <i>et al.</i> ,      | 1999 | 281 | WHQ subscale, depression | Higher frequency of fertility difficulties        | Lack of diagnostic validity, mood                  |
| Demyttenaere <i>et al.</i> , | 1995 | 50  | High depressive coping   | Longer conception time                            | Lack of diagnostic validity, mood                  |
| Van Balen <i>et al.</i> ,    | 1993 | 108 | Well being questionnaire | Greater depression in long-term infertile couples | Lack of diagnostic validity, mood, cross-sectional |
| Kee <i>et al.</i> ,          | 2000 | 138 | BDI, depression          | Failed IVF resulted in greater depression         | Mood assessed after IVF result known to woman      |

intake subsequently accounted for both 7% of the pregnancy and 7% of the non-pregnancy groups. Likewise, Mindes *et al.*, (2003) reported no significant difference in initial depression scores (measured by the CES-D) in women with infertility problems who became pregnant and those who did not at 6–12 months follow-up. Neither study controlled for age, duration of infertility treatment, FSH, oocyte or embryo status.

## Part II: Directions for future research

The relationship between affective disorders and fertility is extremely complex and a biospsychosocial multimodal approach is needed to tease out the many independent variables.

### *Recommendation 1: investigate the hypothalamic pituitary gonadal axis in mood disorder patients*

More studies are needed examining the HPG axis in both unipolar and bipolar populations. Cortisol releasing hormone (CRH) induced proopiomelanocortin peptides inhibit GnRH secretion and CRH has been found to be dysregulated in major depressive disorder (Gold and Chrousos, 2002). Only a few studies have focused exclusively on the hypothalamic pituitary gonadal axis in premenopausal women with the diagnosis of major depressive disorder (Young and Korzun, 2002). Baisher *et al.*, (1995) reported that untreated premenopausal depressed women had higher testosterone levels than controls, but no differences in basal and GnRH stimulated LH, FSH, estradiol or progesterone levels. O'Toole *et al.*, (1995) reported that in contrast to a sample of post-menopausal and perimenopausal patients, premenopausal depressed patients showed no differences in diurnal or nocturnal basal gonadotropin concentrations compared with non-depressed controls. Similarly, Young *et al.*, (2000) matched 25 women with major depression to healthy controls of same age and menstrual cycle day and sampled FSH, estradiol and LH every 10 min for 12 h. No differences were found between the groups on any measures except lower mean estrogen levels in the follicular phase and a shorter half-life of LH in the depressed group.

In contrast, Meller *et al.*, (2001) compared LH pulses in 26 women with current or past history of DSM IV diagnosed affective disorder (23 recurrent unipolar major depression and 3 bipolar II, currently depressed) and 24 control women. No women were on medications and there was no difference between groups regarding age, weight or day of LH sampling. All women were admitted for 8 h and LH was sampled every 10 min. Depressed patients showed slower frequency and decreased rhythmicity of LH pulses but no change in amplitude compared with controls. The clinical significance of these differences is currently not understood, since the study did not report whether these differences affected ovarian follicular development or ovulation. Further research should focus on comparing the HPG axis characteristics in women with major depression and infertility and euthymic women with infertility and the clinical outcomes of these differences.

### *Recommendation 2: investigate the psychopharmacologic effects of infertility medications*

The psychopharmacologic effects of the infertility medication may be an important independent risk factor for the development

of depression in infertility patients. Most studies have not controlled for this and have not clarified type and dose of medication. There are only a few studies and case reports investigating the effects of infertility medications on mood (Blenner, 1991; Williams and Casper, 1995; Choi *et al.*, 2005). However, it makes theoretical sense that these medications may influence the development of mood disorders, since these medications acutely and dramatically alter serum levels of estrogen and progesterone, and research has shown that some women are especially vulnerable to the onset of mood disorders at times of hormonal change, such as postpartum and perimenopause (Rapkin *et al.*, 2002; Chaudron *et al.*, 2003).

For instance, many women report that clomiphene citrate is associated with mood changes, including irritability, emotionality, and increased symptoms of premenstrual syndrome (Blenner, 1991). In a small pilot study, Williams and Casper (1995) reported that clomiphene citrate is associated with fatigue at midcycle, at the time when the estradiol levels are highest. Future studies should investigate whether clomiphene and human menopausal gonadotropins, including menotropins (Humegon, Pergonal and Pregova) and urofollitropin (e.g. Metrodin), are associated with more mood changes in women with a history of mood lability at times of hormonal change, such as women with a history of premenstrual dysphoric disorder or bipolar disorder.

### *Recommendation 3: investigate rates of mood disorders in specific infertility populations*

The prevalence of mood disorders in female infertility patients may be independently and differentially related to certain causes of infertility and future studies should control for this important independent variable. Since male factors, such as sperm motility problems, are a common cause of infertility, future studies that investigate the possibility of shared biological pathways between mood and infertility in women should clearly study female infertility separately. In so doing, the importance of biological versus psychological factors in depressive symptoms and disorders in female infertility can be elucidated, since the diagnosis of a fertility problems, even if male factor related, may itself independently affect mood.

Specific female infertility related disorders should be studied separately. For instance, Weiner *et al.*, (2004) recently reported that women with polycystic ovarian syndrome (PCOS) experienced more depression than a matched control group and that the most negative mood scores were associated with higher free testosterone values. Similarly, Rasgon *et al.*, (2003) reported a high prevalence of major depression in 32 women with PCOS and noted that depressive symptoms were related to BMI and insulin resistance. Rasgon *et al.*, (2002) also described a case of a woman with treatment resistant major depression and PCOS whose mood disorder finally remitted once her insulin resistance and hyperandrogenism were treated with metformin and spironolactone.

## Conclusions

Mood disorders and fertility in women have a complex relationship. This review of the literature suggests that mood disorders may be associated with decreased fertility rates, but the direction

of causality is still unclear and likely variable, depending on independent factors, such as female infertility subtype, that need further investigation. Future epidemiological studies should use standardized, validated measures of major depression and bipolar disorder. Fertility should be clearly defined and infertility carefully evaluated prior to the diagnosis of 'unexplained' infertility. Studies should control for such confounding variables as birth control use, frequency and timing of sexual intercourse and desire for children. Studies investigating pregnancy outcome in depressed female infertility patients should control for comorbid anxiety disorders and stress levels, medication use, and report important variables such as FSH levels, number and quality of oocytes, number of embryos transferred and the quality of these embryos and rates of spontaneous abortion when comparing patients and controls. It is recommended that further research focus on the HPG axis function in women with mood disorders and the clinical correlates of dysregulation, such as differences in menstrual cycle characteristics in depressed and non-depressed patients or patients with bipolar disorder.

The influence of decreased fertility on mood disorders is also complex. Future studies should focus on specific variables and risk factors for the onset of a mood disorder, such as the effect of the hormonal manipulations associated with the assisted reproductive technology process on mood. Such research would provide information for not only the field of fertility but also for women's greater psychiatric health, since the subtle and complex relationship between HPG function and mood remains an important area of investigation across the female life cycle, from puberty to menopause.

## References

- Abma JC, Chandra A, Mosher WD, Peterson LS, Piccinino LJ. Fertility, family planning and women's health: estimates from the National Survey of family growth. *Vital Health Stat* 1997;**23**:1–14.
- American Psychiatric Association. *Diagnostic and Statistical Manual of Mental Disorders*, 4th edn. Washington DC: Text Revision, 2000.
- Anderson KM, Sharpe M, Rattray, Irvine DS. Distress and concerns in couples referred to a specialist infertility clinic. *J Psychosom Res* 2003;**54**: 353–355.
- Baischer W, Koinig G, Hartmann B, Huber J, Langer G. Hypothalamic-pituitary-gonadal axis in depressed premenopausal women: elevated blood testosterone concentrations compared to normal controls. *Psychoneuroendocrinology* 1995;**20**:553–559.
- Baron M, Risch N, Mendlewicz J. Differential fertility in bipolar affective illness. *J Affect Disord* 1982;**4**:103–112.
- Beaurepaire J, Jones M, Thiering P, Saunders D, Tennant C. Psychosocial adjustment to infertility and its treatment: male and female responses at different stages of IVF/ET treatment. *J Psychosom Res* 1994;**38**: 229–240.
- Beutel M, Kupfer J, Kirchmeyer P, Kehde S, Kohn FM, Schroeder-Printzen I, Gips H, Herrero HJ, Weidner W. Treatment-related stresses and depression in couples undergoing assisted reproductive treatment by IVF or ICSI. *Andrologia* 1999;**31**:27–35.
- Bisaga K, Petkova E, Cheng J, Davies M, Feldman JF, Whitaker AH. Menstrual functioning and psychopathology in a county-wide population of high school girls. *J Am Acad Child Adolesc Psychiatry* 2002;**41**:1197–1204.
- Blenner JL. Clomiphene-induced mood swings. *J Obstet Gynecol Neonatal Nurs* 1991;**20**:321–327.
- Bringhentti F, Martinelli F, Ardenti R, La Sala GB. Psychological adjustment of infertile women entering IVF treatment: differentiating aspects and influencing factors. *Acta Obstet Gynecol Scand* 1997;**76**:431–437.
- Calzeroni A, Conte G, Pennati A, Vita A, Sacchetti E. Celibacy and fertility rates in patients with major affective disorders: the relevance of delusional symptoms and suicidal behaviour. *Acta Psychiatr Scand* 1990;**82**:309–310.
- Chaudron LH, Pies RW. The relationship between postpartum psychosis and bipolar disorder: a review. *J Clin Psychiatry* 2003;**64**:1284–1292.
- Chen T, Chang S, Tsai C, Juang K. Prevalence of depressive and anxiety disorders in an assisted reproductive technique clinic. *Hum Reprod* 2004;**19**:2313–2318.
- Chiba H, Mori E, Morioka Y, Kashiwakura M, Nadaoka T, Saito H, Hiroi M. Stress of female infertility: relations to length of treatment. *Gynecol Obstet Invest* 1997;**43**:171–177.
- Choi SH, Shapiro H, Robinson GE, Irvine J, Neuman J, Rosen B, Murphy J, Stewart D. Psychological side effects of clomiphene citrate and human menopausal gonadotropins. *J Psychosom Obstet Gynaecol* 2005;**26**:93–100.
- Connolly KJ, Edelman RJ, Cooke ID, Robson J. The impact of infertility on psychological functioning. *J Psychosom Res* 1992;**36**:459–468.
- Demyttenaere K, Nijs P, Evers-Kiebooms, Koninckx PR. Coping and the ineffectiveness of coping influence the outcome of in vitro fertilization through stress responses. *Psychoneuroendocrinology* 1992;**17**: 655–665.
- Demyttenaere K, Bonte L, Ghedolf M, Vervaeke M, Meuleman C, Vanderschuerem D, D'Hooghe T. Coping style and depression level influence outcome in in vitro fertilization. *Fertil and Steril* 1998;**69**:1026–1033.
- Domar A, Broome A, Zuttermeister PC, Seibel M, Friedman R. The prevalence and predictability of depression in infertile women. *Fertil Steril* 1992;**58**: 1158–1163.
- Domar AD, Zuttermeister PC, Friedman R. The psychological impact of infertility: A comparison of patients with other medical conditions. *J Psychosom Obstet Gynec* 1993;**14**(Suppl):45–52.
- Downey J, Yingling S, McKinney M, Husami N, Jewelewicz R, Maidman J. Mood disorders, psychiatric symptoms, and distress in women presenting for infertility evaluation. *Fertil Steril* 1989;**52**:425–432.
- Downey J, McKinney M. The psychiatric status of women presenting for infertility evaluation. *Am J Orthopsychiatry* 1992;**62**:196–205.
- Edelman RJ, Connolly K. Psychological aspects of infertility. *Br J Med Psychol* 1986;**59**(Pt 3):209–219.
- Emery M, Beran MD, Darwiche J, Oppizzi L, Joris V, Capel R, Guex P, Germond Y. Results from a prospective, randomized, controlled study evaluating the acceptability and effects of routine pre-IVF counselling. *Hum Reprod* 2003;**18**:2647–2653.
- Emiliano AB, Fudge JL. From galactorrhea to osteopenia: rethinking serotonin-prolactin interaction. *Neuropsychopharmacology* 2004;**29**: 833–896.
- Fassino S, Piero A, Boggio S, Piccioni V, Garzaro L. Anxiety, depression and anger suppression in infertile couples: a controlled study. *Hum Reprod* 2002;**17**:2986–2994.
- Fido A. Emotional distress in infertile women in Kuwait. *Int J Fertil Womens Med* 2004;**49**:24–28.
- Gendell KA, Bulik CM, Joyce PR, McIntosh VV, Carter FA. Menstrual cycle irregularity in bulimia nervosa. Associated factors and changes with treatment. *J Psychosom Res* 2000;**49**:409–415.
- Gold DW, Chrousos GP. Organization of the stress system and its dysregulation in melancholic and atypical depression: high vs. low CRH/NE states. *Mol Psychiatry* 2002;**7**:254–275.
- Golombok S. Psychological functioning in infertility patients. *Hum Reprod* 1992;**7**:208–212.
- Greil AL. Infertility and psychological distress: a critical review of the literature. *Soc Sci Med* 1997;**45**:1679–1704.
- Grodstein F, Goldman MB, Ryan L, Cramer DW. Self reported use of pharmaceuticals and primary ovulatory infertility. *Epidemiology* 1993;**4**: 151–156.
- Guerra D, Llobera A, Beiga A, Barri PN. Psychiatric morbidity in couples attending a fertility service. *Human Reprod* 1998;**13**:1733–1736.
- Guz H, Ozkan A, Sarisoy G, Yanki F, Yanik A. Psychiatric symptoms in Turkish infertile women. *J Psychosom Obstet Gynaecol* 2003;**24**:267–271.
- Haddad PM, Wieck A. Antipsychotic induced hyperprolactinemia: mechanisms, clinical features and management. *Drugs* 2004;**64**:2291–2314.
- Hamilton M. A rating scale for depression. *J Neur Neurosurg Psychiatr* 1960;**23**:56–62.
- Harlow BL, Cramer DW, Annis KM. Association of medically treated depression and age at natural menopause. *Am J Epidemiol* 1995;**141**:1170–1176.
- Harlow BL, Wise LA, Otto MW, Soares C and Cohen LS. Depression and its influence on reproductive endocrine and menstrual cycle markers associated with perimenopause: the Harvard Study of Moods and Cycles. *Arch Gen Psychiatry* 2003;**60**:29–36.



- Harlow BL, Cohen LS, Otto MW, Spiegelman D, Cramer DW. Early life menstrual characteristics and pregnancy experiences among women with and without major depression: the Harvard study of moods and cycles. *J Affect Disord* 2004;**79**:167–176.
- Hemels ME, Einarson A, Koren G, Lactot KL, Einarson TR. Antidepressant use during pregnancy and the rates of spontaneous abortions: a meta-analysis. *Ann Pharmacother* 2005;**39**:803–809.
- Holmes LB, Harvey EA, Coull BA. The teratogenicity of anticonvulsant drugs. *N Engl J Med* 2001;**344**:1132–1138.
- Hynes GJ, Callan VJ, Terry DJ, Gallois C. The psychological well-being of infertile women after a failed IVF attempt: the effects of coping. *Br J Med Psychol* 1992;**5**(Pt 3):269–278.
- Joffe H, Kim DR, Foris JM, Baldassano CF, Gylai L, Hwang DH, McLaughlin WL, Sachs GS, Thase ME, Harlow BL. Menstrual dysfunction prior to onset of psychiatric illness is reported more commonly by women with bipolar disorder than by women with unipolar depression and healthy controls. *J Clin Psychiatry* 2006;**67**:297–304.
- Jonsson SA. Marriage rate and fertility in cycloid psychosis: comparison with affective disorder, schizophrenia and the general population. *Eur Arch Psychiatry Clin Neurosci* 1991;**24**:119–125.
- Kee BS, Jung BJ, Lee SH. A study on psychological strain in IVF patients. *J Assist Reprod Genet* 2000;**17**:445.
- Kemeter P. Studies on psychosomatic implications of infertility—effects of emotional stress on fertilization and implantation in in-vitro fertilization. *Hum Reprod* 1988;**3**:341–352.
- Kessler RC, Birnbaum H, Demler O, Falloon IR, Gagnon E, Guyer M, Howes MJ, Kendler KS, Shi L, Walters E *et al*. The prevalence and correlates of nonaffective psychosis in the National Comorbidity Survey Replication (NCS-R). *Biological Psychiatry* 2005;**58**:668–676.
- Klock SC. A pilot study of the relationship between selective serotonin reuptake inhibitors and in vitro fertilization outcome. *Fertil Steril* 2004;**82**:968–969.
- Lapane KL, Zierler S, Lasater TM, Stein M, Barbour M, Hume AL. Is a history of depressive symptoms associated with an increased risk of infertility in women? *Psychosom Med* 1995;**57**:509–513; discussion 514–516.
- Link PW, Darling CA. Couples undergoing treatment for infertility: dimensions of life satisfaction. *J Sex Marital Ther* 1986;**12**:46–59.
- Lok IH, Cheung LP, Chung WS, Lo WK, Haines CJ. Psychiatric morbidity amongst infertile Chinese women undergoing treatment with assisted reproductive technology and the impact of treatment failure. *Gynecol Obstet Invest* 2002;**53**:195–199.
- Lukse MP, Vacc NA. Grief, depression, and coping in women undergoing infertility treatment. *Obstet Gynecol* 1999;**93**:245–251.
- Maciejewski PK, Prigerson HG, Mazure CM. Sex differences in event related risk for major depression. *Psychol Med* 2001;**31**:595–604.
- Malhi GS, Berk M, Bourin M, Ivanovski B, Dodd S, Lagopoulos J, Mitchell PB. Atypical mood stabilizers: a “typical role for atypical antipsychotics”. *Acta Psychiatr Scand Suppl* 2003;**426**:29–38.
- Marcus MD, Loucks TL, Berga SL. Psychological correlates of functional hypothalamic amenorrhea. *Fertil Steril* 2001;**76**:310–316.
- Matsubayashi H, Hosaka T, Izumi S, Suzuki T, Makino T. Emotional distress of infertile women in Japan. *Hum Reprod* 2001;**16**:966–969.
- McKenna K, Koren G, Tetelbaum M, Wilton L, Shakir S, Diav-Citrin O, Levinson A, Ziparsky RB, Einarson A. Pregnancy outcome of women using atypical antipsychotic drugs: a prospective comparative study. *J Clin Psych* 2005;**66**:444–449.
- Meczekalski B, Tonetti A, Monteleone P, Bernardi F, Luisi S, Stomati M, et Luisi M, Petraglia F, Genazzan AR. Hypothalamic amenorrhea with normal body weight: ACTH, allopregnanolone and cortisol responses to corticotropin-releasing hormone test. *Eur J Endocrinol* 2000;**142**:280–285.
- Meller WH, Grambsch PL, Bingham C, Tagatz GE. Hypothalamic pituitary gonadal axis dysregulation in depressed women. *Psychoneuroendocrinology* 2001;**226**:253–259.
- Meller W, Burns LH, Crow S, Grambsch P. Major depression in unexplained infertility. *J Psychosom Obstet Gynaecol* 2002;**23**:27–30.
- Merari D, Feldberg D, Elizur A, Goldman J, Modan B. Psychological and hormonal changes in the course of an in vitro fertilization. *J Assist Reprod Genet*. 1992;**9**:161–169.
- Mindes EJK, Ingram M, Kliewer W, James CA. Longitudinal analyses of the relationship between unsupportive social interactions and psychological adjustment among women with fertility problems. *Soc Sci Med* 2003;**56**:2165–2180.
- Morrell MJ, Isojarvi J, Taylor AE, Dam M, Ayala R, Gomez G. Higher androgens and weight gain with valproate compared with lamotrigine for epilepsy. *Epilepsy Res* 2003;**5**:189–199.
- Nemeroff CB. Use of atypical antipsychotics in refractory depression and anxiety. *J Clin Psychiatry* 2005;**66**(Suppl 8):13–21, Review.
- Newton CR, Hearn MT, Yuzpe AA. Psychological assessment and follow-up after in vitro fertilization: assessing the impact of failure. *Fertil Steril* 1990;**54**:879–886.
- Odergard O. Fertility of psychiatric first admissions in Norway 1936–1975. *Acta Psychiatr Scand* 1980;**62**:212–220.
- Oddens BJ, Den Tonkelaar I, Nieuwenhuys H. Psychosocial experiences in women facing fertility problems—a comparative survey. *Hum Reprod* 1999;**14**:255–261.
- O’Toole SM, Rubin RT. Neuroendocrine aspects of primary endogenous depression, 14: gonadotropin secretion in female patients and their matched controls. *Psychoneuroendocrinology* 1995;**20**:603–612.
- Paulson JD, Haarmann BS, Salerno RL, Asmar P. An investigation of the relationship between emotional maladjustment and infertility. *Fertil Steril* 1988;**49**:258–262.
- Perlis RH, Welge JA, Vornik LA, Hirschfield R, Keck PE. Atypical antipsychotics in the treatment of mania: a meta-analysis of placebo controlled trials. *J Clin Psych* 2006;**67**:509–516.
- Ramezanzadeh F, Aghssa MM, Abedinia N, Zayeri F, Khanafshar N, Shariat M, Jafarabadi M. A survey of relationship between anxiety, depression and duration of infertility. *BMC Womens Health* 2004;**4**:9.
- Rapkin AJ, Mikacich JA, Moatakef-Imani B, Rasgon N. The clinical nature and formal diagnosis of premenstrual postpartum and perimenopausal affective disorders. *Curr Psychiatry Rep* 2002;**4**:419–428.
- Rasgon NL, Carter MS, Elman S, Bauer M, Love M, Korenman SG. Common treatment of polycystic ovarian syndrome and major depressive disorder: case report and review. *Curr Drug Targets Immune Endocr Metabol Disord* 2002;**2**:97–102.
- Rasgon NL, Rao RC, Hwang S, Althuler LL, Elman S, Zuckerbrow-Miller J, Korenman SG. Depression in women with polycystic ovary syndrome: clinical and biochemical correlates. *J Affect Disord* 2003;**74**:299–304.
- Rasgon N. The relationship between polycystic ovary syndrome and anti-epileptic drugs: a review of the evidence. *J Clin Psychopharmacol* 2004;**24**:322–334.
- Rasgon NL, Althuler LL, Fairbanks L, Elman S, Bitran J, Labarea R, Saad M. Reproductive function and risk for PCOS in women treated for bipolar disorder. *Bipolar Disord* 2005;**7**:246–259.
- Reading AE, Chang LC, Kerin JF. Attitudes and anxiety levels in women conceiving through in vitro fertilization and gamete intrafallopian transfer. *Fertil Steril* 1989;**52**:95–99.
- Resch M, Nagy G, Pinter J, Szendei G, Haasz P. Eating disorders and depression in Hungarian women with menstrual disorders and infertility. *J Psychosom Obstet Gynaecol* 1999;**20**:152–157.
- Rowland AS, Baird DD, Long S, Wegienka G, Harlow S, Alavanja, Sandler DP. Influence of medical conditions and lifestyle factors on the menstrual cycle. *Epidemiology* 2002;**13**:668–674.
- Slade P, Emery J, Lieberman BA. A prospective, longitudinal study of emotions and relationships in in-vitro fertilization treatment. *Hum Reprod* 1997;**12**:183–190.
- Smeenk MJM, Verhaak CM, Eugster A, Minnen A, Zielhuis GA, Braat DDM. The effect of anxiety and depression on the outcome of in-vitro fertilization. *Hum Reprod* 2001;**16**:1420–1423.
- Stewart DE, Boydell KM, McCarthy K, Swerdlyk S, Redmond C, Cohrs W. A prospective study of the effect of brief professionally-led support groups for infertility patients. *Int J Psychiatry Med* 1992;**22**:173–182.
- Terzioglu F. Investigation into effectiveness of counseling on assisted reproductive techniques in Turkey. *J Psychosom Obstet Gynaecol* 2001;**22**:133–141.
- Thiering P, Beaurepaire J, Jones M, Saunders D, Tennant C. Mood state as a predictor of treatment outcome after in vitro fertilization/embryo transfer technology (IVF/ET). *J Psychosom Res* 1993;**37**:481–491.
- van Balen F, Trimbos-Kemper TC. Long term infertile couples: a study of their well-being. *J Psychosom Obstet Gynaecol* 1993;**14**(Suppl):53–60.
- Visser AP, Haan G, Zalmstra H, Wouters I. Psychosocial aspects of in vitro fertilization. *J Psychosom Obstet Gynaecol* 1994;**15**:35–43.
- Weiner DL, Primeau M, Ehrmann DA. Androgens and mood dysfunction in women: comparison of women with polycystic ovarian syndrome to healthy controls. *Psychosom Med* 2004;**66**:356–362.
- Weissman MM, Olfson M. Depression in women: implications for health care research. *Science* 1995;**269**:799–801.
- Williams KE, Casper RC. The Effects of Clomiphene Citrate on Mood Abstract. American College of Neuropsychopharmacology (ACNP) Puerto Rico, 1995.

- Wright J, Allard M, Lecours A, Sabourin S. Psychosocial distress and infertility: a review of controlled research. *Int J Fertil* 1989;**34**: 126–142.
- Yong P, Martin C, Thong J. A comparison of psychological functioning in women at different stages of in vitro fertilization treatment using the mean affect adjective check list. *J Assist Reprod Genet* 2000;**17**: 553–556.
- Young EA, Midgley AR, Carlson NE. Alteration in the hypothalamic-pituitary-ovarian axis in depressed women. *Arch Gen Psychiatry* 2000;**57**:1157–1162.
- Young EA, Korzun A. The hypothalamic-pituitary-gonadal axis in mood disorders. *Endocrinol Metab Clin North Am* 2002;**31**:63–78.

*Submitted on December 8, 2006; resubmitted on April 5, 2007; accepted on May 23, 2007*
